# Supplementary material for: Click, Confuse, Convert? Digital Health Information Seeking, Perceived Usefulness and Reliability of Online Health Information, and Alternative Medicine Use and Beliefs
Source: Research Square preprint supplement (doi:10.21203/rs.3.rs-6610060/v1), 2025-06-03
Supplement: Supplementary file 1 [file cd953f5f76a645cc5361de4d.docx]

**Supplementary materials**

**Supplementary Table 1. Descriptive Statistics of Study Variables. Model 1.**

| Variable | N (mean) | % (sd) |
| --- | --- | --- |
| Frequency of visits to alternative healthcare practitioner |  |  |
| Never | 18,109 | 78.0 |
| Seldom | 2,572 | 11.1 |
| Sometimes | 1,825 | 7.9 |
| Often | 565 | 2.4 |
| Very often | 149 | 0.6 |
| Frequency of online health-seeking |  |  |
| Never or almost never/No internet acess | 6,395 | 27.5 |
| Several times a year | 7,299 | 31.4 |
| Several times a month | 4,572 | 19.7 |
| Several times a week | 2,043 | 8.8 |
| Once a day | 609 | 2.6 |
| Several times a day | 2,302 | 9.9 |
| Sex |  |  |
| Male | 10,708 | 46.1 |
| Female | 12,512 | 53.9 |
| Age | 51.9 | 17.3 |
| Education level |  |  |
| Below Upper secondary | 3,712 | 16.0 |
| Upper secondary | 9,175 | 39.5 |
| Short-cycle tertiary | 2,830 | 12.2 |
| Tertiary specialization and above | 7,503 | 32.3 |
| Marital status |  |  |
| Single | 5,987 | 25.8 |
| Married/Partnered | 13,125 | 56.5 |
| Separated/Divorced | 2,606 | 11.2 |
| Widowed | 1,502 | 6.5 |
| Region |  |  |
| United States | 980 | 4.2 |
| Western Europe | 9,853 | 42.4 |
| Northern Europe | 4,497 | 19.4 |
| Central and Eastern Europe | 6,052 | 26.1 |
| Australia/New Zealand | 1,838 | 7.9 |
| Self-rated health |  |  |
| Poor | 936 | 4.0 |
| Fair | 4,349 | 18.7 |
| Good | 9,578 | 41.3 |
| Very good | 6,758 | 29.1 |
| Excellent | 1,599 | 6.9 |
| Chronic Illness |  |  |
| No | 15,269 | 65.8 |
| Yes | 7,951 | 34.2 |
| Self-placement on  socioeconomic ladder (1-10) | 5.9 | 1.7 |
| Religious group |  |  |
| No religion | 7,570 | 32.6 |
| Christian | 14,929 | 64.3 |
| Jewish | 50 | 0.2 |
| Muslim | 323 | 1.4 |
| Buddhist | 103 | 0.4 |
| Hindu | 72 | 0.3 |
| Other | 173 | 0.8 |
| Perception doctors can be trusted |  |  |
| Strongly disagree | 278 | 1.2 |
| Disagree | 1,366 | 5.9 |
| Neutral | 3,768 | 16.2 |
| Agree | 14,155 | 61.0 |
| Strongly agree | 3,653 | 15.7 |
| Perception of healthcare system fairness |  |  |
| Very unfair | 8,110 | 34.9 |
| Somewhat unfair | 6,543 | 28.2 |
| Neutral | 4,794 | 20.7 |
| Somewhat fair | 2,786 | 12.0 |
| Very fair | 987 | 4.2 |
| Frequency of feeling unhappy or depressed |  |  |
| Never | 8,384 | 36.1 |
| Seldom | 7,283 | 31.4 |
| Sometimes | 5,242 | 22.6 |
| Often | 1,597 | 6.9 |
| Very often | 714 | 3.0 |

*Note: Descriptive statistics were calculated using the first imputed dataset and are based on the analytic sample used in the final regression models (N = 23,220).*

**Supplementary Table 2. Descriptive Statistics of Study Variables. Model 2.1.**

| Variable | N (mean) | % (sd) | N (mean) | % (sd) | N (mean) | % (sd) |
| --- | --- | --- | --- | --- | --- | --- |
| Independent variable  of interest: | **Model 2.1**  **Independent variable of interest:** Internet is useful to help assess seriousness of symptoms | | **Model 2.2**  **Independent variable of interest:** Internet is useful to help verify advice from the doctor | | **Model 2.3**  **Independent variable of interest:** It is not easy to distinguish between reliable and unreliable health information on the internet | |
| Strongly disagree | 2,697 | 11.7 | 3,223 | 14.0 | 654 | 2.8 |
| Disagree | 5,435 | 23.6 | 6,778 | 29.5 | 2,278 | 9.9 |
| Neither agree nor disagree | 5,781 | 25.1 | 6,577 | 28.6 | 4,096 | 17.8 |
| Agree | 8,143 | 35.3 | 5,716 | 24.8 | 10,310 | 44.7 |
| Strongly agree | 1,001 | 4.3 | 719 | 3.1 | 5,708 | 24.8 |
| Frequency of visits to alternative healthcare practitioner |  |  |  |  |  |  |
| Never | 17,966 | 77.9 | 17,929 | 77.9 | 17,954 | 77.9 |
| Seldom | 2,562 | 11.1 | 2,559 | 11.1 | 2,564 | 11.1 |
| Sometimes | 1,818 | 7.9 | 1,817 | 7.9 | 1,815 | 7.9 |
| Often | 563 | 2.4 | 560 | 2.4 | 564 | 2.5 |
| Very often | 148 | 0.6 | 148 | 0.6 | 149 | 0.7 |
| Sex |  |  |  |  |  |  |
| Male | 10,708 | 46.1 | 10,625 | 46.2 | 10,631 | 46.1 |
| Female | 12,512 | 53.9 | 12,388 | 53.8 | 12,415 | 53.9 |
| Age | 51.8 | 17.3 | 51.8 | 17.3 | 51.7 | 17.3 |
| Education level |  |  |  |  |  |  |
| Below Upper secondary | 3,629 | 15.7 | 3,626 | 15.8 | 3,616 | 15.7 |
| Upper secondary | 9,127 | 39.6 | 9,102 | 39.6 | 9,122 | 39.6 |
| Short-cycle tertiary | 2,822 | 12.2 | 2,817 | 12.2 | 2,825 | 12.3 |
| Tertiary specialization and above | 7,479 | 32.4 | 7,468 | 32.5 | 7,483 | 32.5 |
| Marital status |  |  |  |  |  |  |
| Single | 5,954 | 25.8 | 5,945 | 25.8 | 5,957 | 25.9 |
| Married/Partnered | 13,043 | 56.6 | 13,018 | 56.6 | 13,038 | 56.6 |
| Separated/Divorced | 2,595 | 11.3 | 2,593 | 11.3 | 2,592 | 11.3 |
| Widowed | 1,465 | 6.4 | 1,457 | 6.3 | 1,459 | 6.3 |
| Region |  |  |  |  |  |  |
| United States | 980 | 4.3 | 980 | 4.3 | 980 | 4.3 |
| Western Europe | 9,771 | 42.4 | 9,749 | 42.4 | 9,765 | 42.4 |
| Northern Europe | 4,464 | 19.4 | 4,444 | 19.3 | 4,461 | 19.4 |
| Central and Eastern Europe | 6,008 | 26.1 | 6,006 | 26.1 | 6,009 | 26.1 |
| Australia/New Zealand | 1,834 | 8.0 | 1,834 | 8.0 | 1,831 | 7.9 |
| Self-rated health |  |  |  |  |  |  |
| Poor | 921 | 4.0 | 917 | 4.0 | 920 | 4.0 |
| Fair | 4,279 | 18.6 | 4,265 | 18.5 | 4,271 | 18.5 |
| Good | 9,523 | 41.3 | 9,506 | 41.3 | 9,524 | 41.3 |
| Very good | 6,739 | 29.2 | 6,732 | 29.3 | 6,737 | 29.2 |
| Excellent | 1,595 | 6.9 | 1,593 | 6.9 | 1,594 | 6.9 |
| Chronic Illness |  |  |  |  |  |  |
| No | 15,186 | 65.9 | 15,170 | 65.9 | 15,184 | 65.9 |
| Yes | 7,871 | 34.1 | 7,843 | 34.1 | 7,862 | 34.1 |
| Self-placement on socioeconomic ladder (1-10) | 5.9 | 1.7 | 5.9 | 1.7 | 5.9 | 1.7 |
| Religious group |  |  |  |  |  |  |
| No religion | 7,549 | 32.7 | 7,532 | 32.7 | 7,545 | 32.7 |
| Christian | 14,787 | 64.1 | 14,763 | 64.2 | 14,781 | 64.1 |
| Jewish | 49 | 0.2 | 50 | 0.2 | 50 | 0.2 |
| Muslim | 324 | 1.4 | 321 | 1.4 | 323 | 1.4 |
| Buddhist | 103 | 0.5 | 102 | 0.4 | 103 | 0.5 |
| Hindu | 73 | 0.3 | 73 | 0.3 | 72 | 0.3 |
| Other | 172 | 0.8 | 172 | 0.8 | 172 | 0.8 |
| Perception doctors can be trusted |  |  |  |  |  |  |
| Strongly disagree | 277 | 1.2 | 276 | 1.2 | 276 | 1.2 |
| Disagree | 1,351 | 5.9 | 1,350 | 5.9 | 1,357 | 5.9 |
| Neutral | 3,750 | 16.3 | 3,744 | 16.3 | 3,749 | 16.3 |
| Agree | 14,053 | 61.0 | 14,022 | 60.9 | 14,038 | 60.9 |
| Strongly agree | 3,626 | 15.7 | 3,621 | 15.7 | 3,626 | 15.7 |
| Perception of healthcare system fairness |  |  |  |  |  |  |
| Very unfair | 8,048 | 34.9 | 8,036 | 34.9 | 8,047 | 34.9 |
| Somewhat unfair | 6,510 | 28.2 | 6,493 | 28.2 | 6,497 | 28.2 |
| Neutral | 4,753 | 20.6 | 4,751 | 20.6 | 4,759 | 20.7 |
| Somewhat fair | 2,765 | 12.0 | 2,755 | 12.0 | 2,765 | 12.0 |
| Very fair | 981 | 4.3 | 978 | 4.3 | 978 | 4.2 |
| Frequency of feeling unhappy or depressed |  |  |  |  |  |  |
| Never | 8,328 | 36.1 | 8,327 | 36.2 | 8,327 | 36.1 |
| Seldom | 7,235 | 31.4 | 7,218 | 31.4 | 7,232 | 31.4 |
| Sometimes | 5,195 | 22.5 | 5,176 | 22.5 | 5,190 | 22.5 |
| Often | 1,588 | 6.9 | 1,582 | 6.9 | 1,590 | 6.9 |
| Very often | 711 | 3.1 | 710 | 3.1 | 707 | 3.1 |

*Note: Descriptive statistics were calculated using the first imputed dataset and are based on the analytic sample used in the final regression models. Model 2.1 n = 23,057, Model 2.2 n = 23,013, Model 2.3 n = 23,046.*

**Supplementary Table 3. Descriptive Statistics of Study Variables. Model 3.**

| Variable | N (mean) | % (sd) |
| --- | --- | --- |
| Belief alternative medicine is better than conventional medicine |  |  |
| Strongly disagree | 4,203 | 19.0 |
| Disagree | 6,653 | 30.0 |
| Neutral | 8,233 | 37.1 |
| Agree | 2,445 | 11.0 |
| Strongly agree | 642 | 2.9 |
| Frequency of online health-seeking |  |  |
| Never or almost never/No internet acess | 6,017 | 27.1 |
| Several times a month | 6,981 | 31.5 |
| Several times a week | 4,382 | 19.8 |
| Once a day | 1,978 | 8.9 |
| Several times a day | 584 | 2.6 |
| Several times a year | 2,234 | 10.1 |
| Sex |  |  |
| Male | 10,224 | 46.1 |
| Female | 11,952 | 53.9 |
| Age | 52.0 | 17.2 |
| Education level |  |  |
| Below Upper secondary | 3,459 | 15.6 |
| Upper secondary | 8,725 | 39.3 |
| Short-cycle tertiary | 2,737 | 12.3 |
| Tertiary specialization and above | 7,255 | 32.7 |
| Marital status |  |  |
| Single | 5,629 | 25.4 |
| Married/Partnered | 12,617 | 56.9 |
| Separated/Divorced | 2,498 | 11.3 |
| Widowed | 1,432 | 6.5 |
| Region |  |  |
| United States | 980 | 4.4 |
| Western Europe | 9,362 | 42.2 |
| Northern Europe | 4,223 | 19.0 |
| Central and Eastern Europe | 5,804 | 26.2 |
| Australia/New Zealand | 1,807 | 8.2 |
| Self-rated health |  |  |
| Poor | 891 | 4.0 |
| Fair | 4,097 | 18.5 |
| Good | 9,174 | 41.4 |
| Very good | 6,495 | 29.3 |
| Excellent | 1,519 | 6.9 |
| Chronic Illness |  |  |
| No | 14,558 | 65.7 |
| Yes | 7,618 | 34.3 |
| Self-placement on socioeconomic ladder (1-10) | 5.9 | 1.7 |
| Religious group |  |  |
| No religion | 7,273 | 32.8 |
| Christian | 14,211 | 64.1 |
| Jewish | 49 | 0.2 |
| Muslim | 308 | 1.4 |
| Buddhist | 98 | 0.4 |
| Hindu | 70 | 0.3 |
| Other | 167 | 0.8 |
| Perception doctors can be trusted |  |  |
| Strongly disagree | 266 | 1.2 |
| Disagree | 1,284 | 5.8 |
| Neutral | 3,586 | 16.2 |
| Agree | 13,515 | 60.9 |
| Strongly agree | 3,525 | 15.9 |
| Perception of healthcare system fairness |  |  |
| Very unfair | 7,665 | 34.6 |
| Somewhat unfair | 6,289 | 28.4 |
| Neutral | 4,605 | 20.8 |
| Somewhat fair | 2,670 | 12.0 |
| Very fair | 947 | 4.3 |
| Frequency of feeling unhappy or depressed |  |  |
| Never | 8,010 | 36.1 |
| Seldom | 6,963 | 31.4 |
| Sometimes | 5,020 | 22.6 |
| Often | 1,511 | 6.8 |
| Very often | 672 | 3.0 |

*Note: Descriptive statistics were calculated using the first imputed dataset and are based on the analytic sample used in the final regression models (N = 22,176).*

**Supplementary Table 4. Descriptive Statistics of Study Variables. Models 4.1-4.3.**

| Variable | N (mean) | % (sd) | N (mean) | % (sd) | N (mean) | % (sd) |
| --- | --- | --- | --- | --- | --- | --- |
| Independent variable  of interest: | **Model 4.1**  **Independent variable of interest:** Internet is useful to help assess seriousness of symptoms | | **Model 4.2**  **Independent variable of interest:** Internet is useful to help verify advice from the doctor | | **Model 4.3**  **Independent variable of interest:** It is not easy to distinguish between reliable and unreliable health information on the internet | |
| Strongly disagree | 2,558 | 11.5 | 3,064 | 13.8 | 627 | 2.8 |
| Disagree | 5,218 | 23.6 | 6,530 | 29.5 | 2,189 | 9.9 |
| Neither agree nor disagree | 5,564 | 25.1 | 6,320 | 28.5 | 3,931 | 17.7 |
| Agree | 7,862 | 35.5 | 5,546 | 25.0 | 9,945 | 44.9 |
| Strongly agree | 955 | 4.3 | 695 | 3.1 | 5,466 | 24.7 |
| Belief alternative medicine is better than conventional medicine |  |  |  |  |  |  |
| Strongly disagree | 4,198 | 19.0 | 4,198 | 19.0 | 4,197 | 18.9 |
| Disagree | 6,643 | 30.0 | 6,644 | 30.0 | 6,644 | 30.0 |
| Neutral | 8,229 | 37.1 | 8,228 | 37.1 | 8,232 | 37.2 |
| Agree | 2,445 | 11.0 | 2,444 | 11.0 | 2,444 | 11.0 |
| Strongly agree | 642 | 2.9 | 641 | 2.9 | 641 | 2.9 |
| Sex |  |  |  |  |  |  |
| Male | 10,220 | 46.1 | 10,216 | 46.1 | 10,217 | 46.1 |
| Female | 11,937 | 53.9 | 11,939 | 53.9 | 11,941 | 53.9 |
| Age | 52.0 | 17.2 | 52.0 | 17.2 | 52.0 | 17.2 |
| Education level |  |  |  |  |  |  |
| Below Upper secondary | 3,449 | 15.6 | 3,449 | 15.6 | 3,449 | 15.6 |
| Upper secondary | 8,719 | 39.4 | 8,719 | 39.4 | 8,719 | 39.3 |
| Short-cycle tertiary | 2,736 | 12.4 | 2,736 | 12.4 | 2,736 | 12.3 |
| Tertiary specialization and above | 7,253 | 32.7 | 7,251 | 32.7 | 7,254 | 32.7 |
| Marital status |  |  |  |  |  |  |
| Single | 5,627 | 25.4 | 5,627 | 25.4 | 5,628 | 25.4 |
| Married/Partnered | 12,613 | 56.9 | 12,611 | 56.9 | 12,611 | 56.9 |
| Separated/Divorced | 2,496 | 11.3 | 2,496 | 11.3 | 2,497 | 11.3 |
| Widowed | 1,421 | 6.4 | 1,421 | 6.4 | 1,422 | 6.4 |
| Region |  |  |  |  |  |  |
| United States | 980 | 4.4 | 980 | 4.4 | 980 | 4.4 |
| Western Europe | 9,358 | 42.2 | 9,357 | 42.2 | 9,359 | 42.2 |
| Northern Europe | 4,228 | 19.1 | 4,224 | 19.1 | 4,223 | 19.1 |
| Central and Eastern Europe | 5,783 | 26.1 | 5,786 | 26.1 | 5,788 | 26.1 |
| Australia/New Zealand | 1,808 | 8.2 | 1,808 | 8.2 | 1,808 | 8.2 |
| Self-rated health |  |  |  |  |  |  |
| Poor | 885 | 4.0 | 884 | 4.0 | 883 | 4.0 |
| Fair | 4,093 | 18.5 | 4,090 | 18.5 | 4,092 | 18.5 |
| Good | 9,169 | 41.4 | 9,170 | 41.4 | 9,172 | 41.4 |
| Very good | 6,492 | 29.3 | 6,493 | 29.3 | 6,492 | 29.3 |
| Excellent | 1,518 | 6.9 | 1,518 | 6.9 | 1,519 | 6.9 |
| Chronic Illness |  |  |  |  |  |  |
| No | 14,549 | 65.7 | 14,554 | 65.7 | 14,555 | 65.7 |
| Yes | 7,608 | 34.3 | 7,601 | 34.3 | 7,603 | 34.3 |
| Self-placement on socioeconomic ladder (1-10) | 5.9 | 1.7 | 5.9 | 1.7 | 5.9 | 1.7 |
| Religious group |  |  |  |  |  |  |
| No religion | 7,271 | 32.8 | 7,272 | 32.8 | 7,272 | 32.8 |
| Christian | 14,192 | 64.1 | 14,189 | 64.0 | 14,192 | 64.1 |
| Jewish | 49 | 0.2 | 49 | 0.2 | 49 | 0.2 |
| Muslim | 309 | 1.4 | 309 | 1.4 | 309 | 1.4 |
| Buddhist | 99 | 0.5 | 99 | 0.5 | 99 | 0.5 |
| Hindu | 70 | 0.3 | 70 | 0.3 | 70 | 0.3 |
| Other | 167 | 0.8 | 167 | 0.8 | 167 | 0.8 |
| Perception doctors can be trusted |  |  |  |  |  |  |
| Strongly disagree | 265 | 1.2 | 265 | 1.2 | 265 | 1.2 |
| Disagree | 1,282 | 5.8 | 1,282 | 5.8 | 1,283 | 5.8 |
| Neutral | 3,581 | 16.2 | 3,581 | 16.2 | 3,583 | 16.2 |
| Agree | 13,506 | 61.0 | 13,504 | 61.0 | 13,504 | 60.9 |
| Strongly agree | 3,523 | 15.9 | 3,523 | 15.9 | 3,523 | 15.9 |
| Perception of healthcare system fairness |  |  |  |  |  |  |
| Very unfair | 7,664 | 34.6 | 7,663 | 34.6 | 7,663 | 34.6 |
| Somewhat unfair | 6,281 | 28.4 | 6,279 | 28.3 | 6,282 | 28.4 |
| Neutral | 4,598 | 20.8 | 4,599 | 20.8 | 4,599 | 20.8 |
| Somewhat fair | 2,667 | 12.0 | 2,667 | 12.0 | 2,667 | 12.0 |
| Very fair | 947 | 4.3 | 947 | 4.3 | 947 | 4.3 |
| Frequency of feeling unhappy or depressed |  |  |  |  |  |  |
| Never | 8,004 | 36.1 | 8,002 | 36.1 | 8,002 | 36.1 |
| Seldom | 6,960 | 31.4 | 6,962 | 31.4 | 6,963 | 31.4 |
| Sometimes | 5,013 | 22.6 | 5,011 | 22.6 | 5,013 | 22.6 |
| Often | 1,508 | 6.8 | 1,508 | 6.8 | 1,508 | 6.8 |
| Very often | 672 | 3.0 | 672 | 3.0 | 672 | 3.0 |

*Note: Descriptive statistics were calculated using the first imputed dataset and are based on the analytic sample used in the final regression models. Model 4.1 n = 22,157, Model 4.2 n = 22,155, Model 4.3 n = 22,158.*
